# Supplementary material for: Development and Evaluation of Multifunctional Poly(Lactic-co-glycolic acid) Nanoparticles Embedded in Carboxymethyl β-Glucan Porous Microcapsules as a Novel Drug Delivery System for Gefitinib
Source: Pharmaceutics. 2019 Sep 12;11(9):469. doi: 10.3390/pharmaceutics11090469 (PMC6781315; doi:10.3390/pharmaceutics11090469)
Supplement: Supplementary file 1 [file pharmaceutics-11-00469-s001.pdf]

Article

# Development and Evaluation of Multifunctional Poly(Lactic-co-glycolic acid) Nanoparticles Embedded in Carboxymethyl $\beta$ -Glucan Porous Microcapsules as a Novel Drug Delivery System for Gefitinib

Xiaonan Li <sup>1,2</sup>, Jinglei Wang <sup>2</sup>, Shang Li <sup>1</sup>, Zhaorong Liu <sup>2</sup>, Zhiru Zheng <sup>2</sup> and Yanzhuo Zhang <sup>1,2,\*</sup>

## Preparation of FA-conjugated CS

FA, n-hydroxysuccinimide (NHS), and 1-(3-dimethylaminopropyl)-3-ethyl carbonimide hydrochloride (EDC·HCl) (with a molar ratio of 1:1.2:1.2) were dissolved in 10ml of dimethyl sulfoxide, and then stirred for 3 h to activate carboxyl groups of FA. Subsequently, 10 ml of 1% (w/v) CS solution was dipped into the above dimethyl sulfoxide solution, and the mixed solution was stirred at 35°C in the dark for 16 h. Next, the solution was brought to pH 9.0 by addition of diluted aqueous NaOH and dialyzed first against PBS (pH 7.4) for 3 days and subsequently against distilled water for 3 days. Finally, the obtained solution was lyophilized at -55°C for 10 h to collect the FA-conjugated CS.

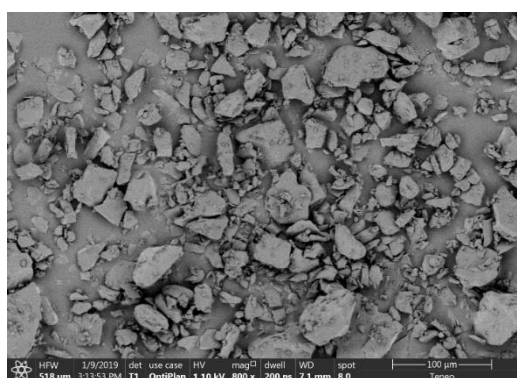

**Figure S1.** SEM photograph of GFB crystals.

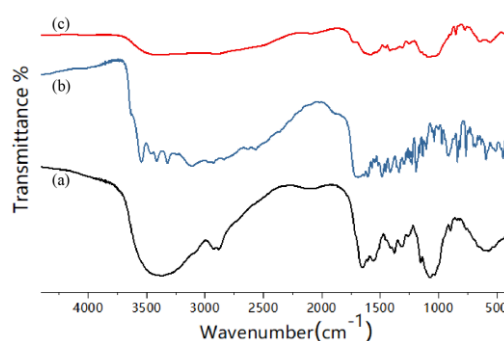

**Figure S2.** FT-IR spectra of (a) FA-conjugated CS, (b) FA, and (c) CS.

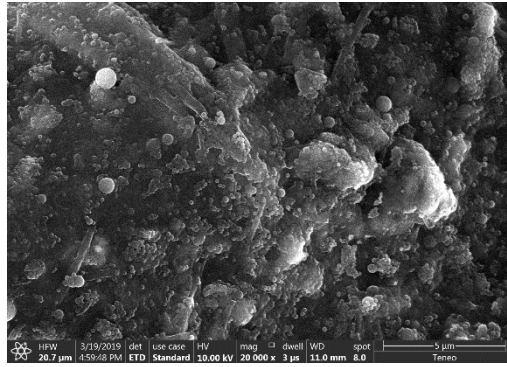

**Figure S3.** SEM photograph of GFB/FCPP-NEMs after drug release for 2h.

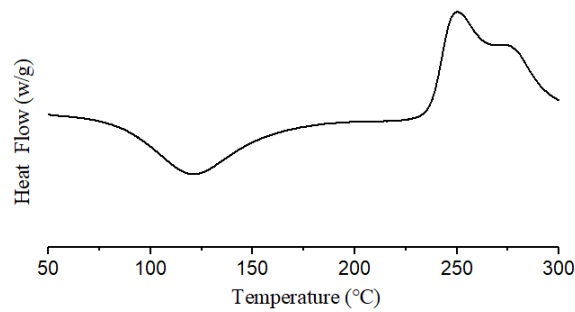

**Figure S4.** DSC thermograms of GFB/FCPP-NEMs after storage for 3 months.

**Table S1.** Model parameters of the tested samples at pH 5.0.

| Samples       | Zero-order |                       | First-order |                       | Higuchi  |                       | Korsmeyer-Peppas |                       |          |
|---------------|------------|-----------------------|-------------|-----------------------|----------|-----------------------|------------------|-----------------------|----------|
|               | <i>k</i>   | <i>r</i> <sup>2</sup> | <i>k</i>    | <i>r</i> <sup>2</sup> | <i>k</i> | <i>r</i> <sup>2</sup> | <i>k</i>         | <i>r</i> <sup>2</sup> | <i>n</i> |
| GEF/FCPP NPs  | 0.006      | 0.107                 | 0.631       | 0.999                 | 0.066    | 0.391                 | 0.528            | 0.961                 | 0.069    |
| GFB/FCPP-NEMs | 0.009      | 0.394                 | 0.232       | 0.998                 | 0.087    | 0.705                 | 0.328            | 0.905                 | 0.207    |

*k* is the release rate constant, *r*<sup>2</sup> is the correlation coefficient, and *n* is the release exponent.

**Table S2.** Model parameters of the tested samples at pH 7.4.

| Samples       | Zero-order |                       | First-order |                       | Higuchi  |                       | Korsmeyer-Peppas |                       |          |
|---------------|------------|-----------------------|-------------|-----------------------|----------|-----------------------|------------------|-----------------------|----------|
|               | <i>k</i>   | <i>r</i> <sup>2</sup> | <i>k</i>    | <i>r</i> <sup>2</sup> | <i>k</i> | <i>r</i> <sup>2</sup> | <i>k</i>         | <i>r</i> <sup>2</sup> | <i>n</i> |
| GEF/FCPP      | 0.012      | 0.708                 | 0.082       | 0.960                 | 0.096    | 0.876                 | 0.124            | 0.865                 | 0.439    |
| GFB/FCPP-NEMs | 0.009      | 0.944                 | 0.031       | 0.971                 | 0.065    | 0.949                 | 0.031            | 0.968                 | 0.685    |

*k* is the release rate constant, *r*<sup>2</sup> is the correlation coefficient, and *n* is the release exponent.

**Table S3.** Median diameter, span, related substances of GFB, and drug content of GFB/FCPP-NEMs before and after storage for 3 months (*n* = 3).

| Formulations               | Median diameter (μm) | Span    | Related substances (%) | Drug content (%) |
|----------------------------|----------------------|---------|------------------------|------------------|
| GFB/FCPP-NEMs <sup>a</sup> | 2.2±0.1              | 1.6±0.2 | < 0.6                  | 99.2±0.4         |
| GFB/FCPP-NEMs <sup>b</sup> | 2.4±0.1              | 1.9±0.1 | < 0.9                  | 98.6±0.8         |

GFB/FCPP-NEMs<sup>a</sup> indicates GFB/FCPP-NEMs before storage.

GFB/FCPP-NEMs<sup>b</sup> indicates GFB/FCPP-NEMs after storage for 3 months.
